# Supplementary material for: Using automated transparent chambers to quantify CO 2 emissions and potential emission reduction by water infiltration systems in drained coastal peatlands in the Netherlands
Source: Copernicus journal article supplement (doi:10.5194/egusphere-2024-403), 2024-02-21
Supplement: Supplementary file 1 [file egusphere-2024-403-supplement.pdf]

*Supplement of*

**Using automated transparent chambers to quantify CO<sub>2</sub> emissions and potential emission reduction by water infiltration systems in drained coastal peatlands in the Netherlands**

- 5 Ralf C.H. Aben<sup>1</sup>, Daniël van de Craats<sup>2</sup>, Jim Boonman<sup>3</sup>, Stijn H. Peeters<sup>1</sup>, Bart Vriend<sup>3</sup>, Coline C.F. Boonman<sup>1</sup>, Ype van der Velde<sup>3</sup>, Gilles Erkens<sup>4,5</sup>, Merit van den Berg<sup>3</sup>

<sup>1</sup>Department of Ecology, Radboud Institute for Biological and Environmental Sciences, Radboud University, Nijmegen, 6525 AJ, the Netherlands

<sup>2</sup>Soil, Water and Land use, Wageningen Environmental Research, Wageningen, 6708 PB, the Netherlands

- 10 <sup>3</sup>Faculty of Science, Department of Earth Sciences, Vrije Universiteit Amsterdam, Amsterdam, 1081 HV, the Netherlands

<sup>4</sup>Deltares Research Institute, Utrecht, 3584 BK, the Netherlands

<sup>5</sup>Department of Physical Geography, Utrecht University, Utrecht, 3584 CS, the Netherlands

*Correspondence to:* Merit van den Berg (m.vandenberg@vu.nl)

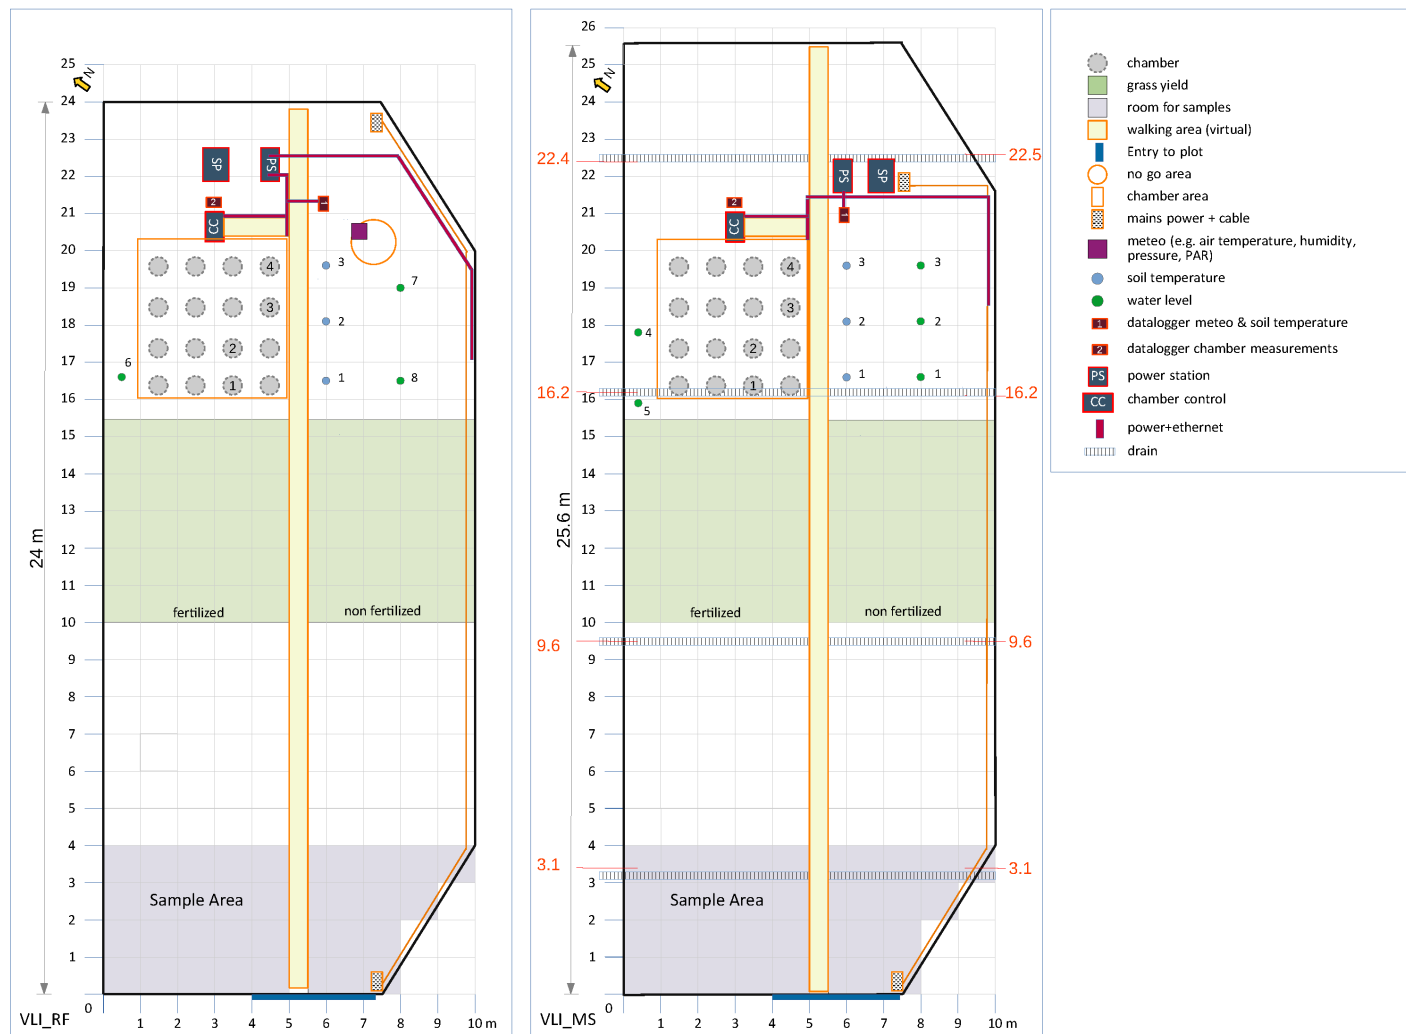

Figure S1. Example of a technical drawing of the measurement plots for a location (VLI) with both a water infiltration system and control plot.

20 Table S1. Estimated carbon budgets, their standard deviation (SD) and average annual (WTD<sub>a</sub>) and summer (WTD<sub>s</sub>) water table depths. Net ecosystem carbon balance (NECB), net ecosystem exchange (NEE), gross primary production (GPP), ecosystem respiration (R<sub>eco</sub>), and harvest are presented in t CO<sub>2</sub>-C ha<sup>-1</sup> yr<sup>-1</sup>. Annual (Cexp<sub>a</sub>) and summer (Cexp<sub>s</sub>) exposed carbon is presented in kg m<sup>-2</sup> yr<sup>-1</sup>.

| Loc | Treatment | Year | NECB              | NECB SD          | CO <sub>2</sub> flux data availability (%) | NEE               | GPP  | R <sub>eco</sub> | Harvest | Start date of NECB | End date of NECB | WTD <sub>a</sub> (cm) | WTD <sub>s</sub> (cm) | Cexp <sub>a</sub> | Cexp <sub>s</sub> |
|-----|-----------|------|-------------------|------------------|--------------------------------------------|-------------------|------|------------------|---------|--------------------|------------------|-----------------------|-----------------------|-------------------|-------------------|
| ALB | CON       | 2021 | 1.3 <sup>x</sup>  | 2.5 <sup>y</sup> | 76.8                                       | -3.2 <sup>z</sup> |      |                  | 4.9     | 2021-01-01         | 2022-01-01       | 21                    | 31                    | 11.1              | 16.6              |
| ALB | CON       | 2022 | 1.4 <sup>x</sup>  | 0.6              | 89.3                                       | -2.4              | 21.9 | 19.5             | 4.6     | 2022-01-01         | 2023-01-01       | 44                    | 66                    | 25.5              | 42.0              |
| ALB | CON       | 2023 | -1.6 <sup>x</sup> | 0.5              | 84.0                                       | -6.4              | 28.5 | 22.2             | 5.7     | 2022-11-14         | 2023-11-14       | 47                    | 59                    | 27.6              | 36.3              |
| ALB | WIS       | 2021 | 3.0 <sup>x</sup>  | 0.6 <sup>y</sup> | 37.2                                       | -1.4 <sup>z</sup> |      |                  | 4.9     | 2021-01-01         | 2022-01-01       | 30                    | 32                    | 18.2              | 19.5              |
| ALB | WIS       | 2022 | -0.1 <sup>x</sup> | 0.5              | 81.0                                       | -3.7              | 19.8 | 16.1             | 4.5     | 2021-11-14         | 2022-11-14       | 37                    | 45                    | 22.5              | 28.7              |
| ALB | WIS       | 2023 | -0.4 <sup>x</sup> | 0.5              | 93.4                                       | -5.1              | 24.9 | 19.7             | 5.6     | 2022-11-14         | 2023-11-14       | 29                    | 37                    | 17.4              | 22.5              |
| ASD | CON       | 2020 | 3.4               | 1.1              | 93.3                                       | -4.3              | 26.8 | 22.5             | 7.7     | 2020-04-01         | 2021-04-01       | 38                    | 65                    | 30.3              | 53.2              |
| ASD | CON       | 2021 | 4.4               | 0.7              | 91.4                                       | -4.4              | 23.0 | 18.6             | 8.7     | 2021-01-01         | 2022-01-01       | 25                    | 32                    | 20.4              | 24.9              |
| ASD | CON       | 2022 | 0.9               | 0.6              | 90.5                                       | -5.0              | 19.3 | 14.3             | 5.9     | 2022-01-01         | 2023-01-01       | 44                    | 68                    | 36.3              | 55.3              |
| ASD | CON       | 2023 | 5.6               | 0.6              | 87.1                                       | -0.9              | 21.3 | 20.4             | 6.5     | 2022-10-15         | 2023-10-14       | 40                    | 59                    | 32.4              | 48.5              |
| ASD | WIS       | 2020 | 1.1               | 0.9              | 90.0                                       | -5.9              | 25.0 | 19.1             | 6.9     | 2020-04-01         | 2021-04-01       | 18                    | 23                    | 19.4              | 23.4              |
| ASD | WIS       | 2021 | 2.6               | 0.9              | 88.8                                       | -4.5              | 21.0 | 16.5             | 7.1     | 2021-01-01         | 2022-01-01       | 24                    | 31                    | 24.2              | 29.7              |
| ASD | WIS       | 2022 | 1.2               | 0.8              | 93.9                                       | -4.7              | 20.5 | 15.7             | 5.9     | 2022-01-01         | 2023-01-01       | 30                    | 38                    | 28.9              | 35.4              |
| ASD | WIS       | 2023 | 0.5               | 0.6              | 85.3                                       | -5.5              | 21.6 | 16.1             | 6.0     | 2022-10-15         | 2023-10-15       | 27                    | 38                    | 26.5              | 35.4              |
| LAW | WIS       | 2022 | 5.1               | 0.6              | 89.0                                       | -0.3              | 20.7 | 20.4             | 5.4     | 2022-02-01         | 2023-02-01       | 35                    | 48                    | 22.3              | 30.5              |
| LAW | WIS       | 2023 | 4.3               | 0.5              | 92.0                                       | 0.0               | 25.0 | 25.0             | 4.3     | 2022-11-01         | 2023-11-01       | 32                    | 45                    | 20.8              | 28.4              |
| ROV | CON       | 2021 | 4.9               | 2.6 <sup>y</sup> | 64.6                                       | -0.7 <sup>z</sup> |      |                  | 5.5     | 2021-01-01         | 2022-01-01       | 37                    | 41                    | 20.4              | 22.6              |
| ROV | CON       | 2022 | 1.0               | 0.3              | 90.9                                       | -4.5              | 20.6 | 16.0             | 5.5     | 2021-12-27         | 2022-12-27       | 37                    | 47                    | 20.6              | 25.8              |
| ROV | CON       | 2023 | 2.7               | 0.6              | 85.9                                       | -5.1              | 22.7 | 17.6             | 7.8     | 2022-12-27         | 2023-12-27       | 27                    | 32                    | 14.1              | 17.1              |
| ROV | WIS       | 2021 | 5.3               | 2.4 <sup>y</sup> | 67.2                                       | -1.0 <sup>z</sup> |      |                  | 6.4     | 2021-01-01         | 2022-01-01       | 44                    | 47                    | 29.3              | 31.2              |
| ROV | WIS       | 2022 | 3.3               | 0.3              | 90.3                                       | -2.2              | 18.0 | 15.8             | 5.5     | 2021-12-27         | 2022-12-27       | 48                    | 53                    | 31.6              | 34.6              |
| ROV | WIS       | 2023 | 3.6               | 0.5              | 91.3                                       | -3.6              | 24.8 | 21.1             | 7.3     | 2022-12-27         | 2023-12-27       | 42                    | 46                    | 27.9              | 30.4              |
| VLI | CON       | 2020 | 5.8               | 1.3              | 76.4                                       | -2.1              | 27.7 | 26.3             | 8.0     | 2020-04-01         | 2021-04-01       | 51                    | 70                    | 44.5              | 57.7              |
| VLI | CON       | 2021 | 5.7               | 0.7              | 94.5                                       | -3.1              | 23.5 | 20.4             | 8.8     | 2021-01-01         | 2022-01-01       | 43                    | 59                    | 38.5              | 50.6              |
| VLI | CON       | 2022 | 7.6               | 0.6              | 84.9                                       | 0.1               | 21.1 | 21.2             | 7.5     | 2022-01-01         | 2023-01-01       | 52                    | 69                    | 45.4              | 57.1              |
| VLI | CON       | 2023 | 6.3               | 0.4              | 92.3                                       | -0.6              | 21.0 | 20.4             | 6.9     | 2022-10-15         | 2023-10-15       | 48                    | 67                    | 42.1              | 56.0              |
| VLI | WIS       | 2020 | 4.2               | 0.7              | 78.3                                       | -3.2              | 24.8 | 21.3             | 7.4     | 2020-04-01         | 2021-04-01       | 51                    | 61                    | 43.1              | 51.0              |
| VLI | WIS       | 2021 | 2.9               | 0.6              | 93.0                                       | -4.2              | 21.4 | 17.2             | 7.1     | 2021-01-01         | 2022-01-01       | 47                    | 57                    | 39.7              | 48.2              |

|     |      |      |     |     |      |      |      |      |     |            |            |    |    |      |      |
|-----|------|------|-----|-----|------|------|------|------|-----|------------|------------|----|----|------|------|
| VLI | WIS  | 2022 | 6.6 | 0.6 | 87.7 | -0.5 | 19.6 | 19.0 | 7.1 | 2022-01-01 | 2023-01-01 | 50 | 60 | 42.3 | 50.4 |
| VLI | WIS  | 2023 | 2.8 | 0.5 | 90.3 | -4.1 | 22.9 | 18.8 | 6.8 | 2022-10-15 | 2023-10-01 | 47 | 61 | 39.7 | 51.0 |
| ZEG | CON  | 2021 | 7.8 | 0.7 | 61.2 | -0.5 | 19.5 | 19.1 | 8.2 | 2021-01-01 | 2022-01-01 | 45 | 66 | 47.5 | 65.5 |
| ZEG | CON  | 2022 | 4.6 | 0.8 | 66.8 | -2.2 | 26.0 | 23.8 | 6.9 | 2021-11-01 | 2022-11-01 | 50 | 74 | 51.0 | 76.3 |
| ZEG | CON  | 2023 | 3.7 | 0.8 | 88.1 | -1.7 | 23.9 | 22.3 | 5.4 | 2022-11-01 | 2023-11-01 | 37 | 57 | 38.2 | 62.9 |
| ZEG | WIS1 | 2021 | 5.0 | 0.9 | 80.0 | -3.9 | 19.7 | 15.8 | 9.0 | 2021-01-01 | 2022-01-01 | 40 | 48 | 36.9 | 41.6 |
| ZEG | WIS1 | 2022 | 2.2 | 0.7 | 75.2 | -5.0 | 24.2 | 19.2 | 7.2 | 2022-01-01 | 2023-01-01 | 41 | 53 | 37.4 | 45.4 |
| ZEG | WIS1 | 2023 | 2.6 | 0.5 | 85.9 | -2.5 | 27.1 | 24.6 | 5.1 | 2022-11-01 | 2023-11-01 | 33 | 47 | 31.1 | 43.0 |
| ZEG | WIS2 | 2022 | 2.0 | 0.4 | 66.1 | -1.7 | 23.1 | 21.4 | 3.7 | 2022-02-01 | 2023-02-01 | 15 | 18 | 15.4 | 18.1 |
| ZEG | WIS2 | 2023 | 1.5 | 0.5 | 82.4 | -2.6 | 25.2 | 22.6 | 4.1 | 2022-11-01 | 2023-11-01 | 15 | 19 | 15.4 | 19.0 |

<sup>x</sup>Including fertilisation of organic manure of 0.32 and 0.53 t CO<sub>2</sub>-C ha<sup>-1</sup> yr<sup>-1</sup> for ALB CON and WIS 2021, respectively, and 0.93 and 0.90 t CO<sub>2</sub>-C ha<sup>-1</sup> yr<sup>-1</sup> for both ALB plots in 2022 and 2023, respectively. The SD of organic mature application was 50% of the estimate.

<sup>y</sup>NECB SD was roughly estimated and is highly uncertain due to large data gaps in CO<sub>2</sub> fluxes.

<sup>z</sup>NEE was gapfilled using Random Forest instead of the Lloyd-Taylor approach. This also resulted in NEE not being partitioned into GPP and Reco. We used the same input variables as used in the Lloyd-Taylor approach. A regression forest was trained with the flags `n_subfeatures = -1` (number of features to consider at random per split, in this case an infinite number); `n_trees = 250` (number of trees to train); `partial_sampling = 0.7` (fraction of samples to train each tree on); `max_depth = -1` (maximum depth of the decision trees, grown to maximum extent, in our case no maximum depth); `min_samples_leaf = 5` (the minimum number of samples each leaf needs to have at minimum); `min_samples_split = 2` (the minimum number of samples in needed for a split) using the `MLJ.jl` and `DecisionTree.jl` packages in the Julia 1.8.3 environment. The choices made in were informed by iterative experimentation using latin hypercube sampling in the Julia 1.8.3 environment.

35 **Table S2. Model fits for the empirical relation between annual water table depth (WTD<sub>a</sub>; m) and net ecosystem carbon balance (NECB; t CO<sub>2</sub>-C ha<sup>-1</sup> yr<sup>-1</sup>). Model slopes and intercepts are given with their 95% confidence interval (CI).**

| Type                       | Model equation                                                     | Slope | 95%CI slope* | Intercept | 95%CI intercept* | R-function {package}   |
|----------------------------|--------------------------------------------------------------------|-------|--------------|-----------|------------------|------------------------|
| Linear regression          | lm(NECB ~ WTD <sub>a</sub> )                                       | 8.96  | 2.54–15.38   | -0.23     | -2.71–2.26       | <i>lm</i> {stats}      |
| Robust linear regression   | rlm(NECB ~ WTD <sub>a</sub> )                                      | 9.67  | 3.04–16.31   | -0.39     | -2.96–2.18       | <i>rlm</i> {MASS}      |
| Deming regression**        | deming(NECB ~ WTD <sub>a</sub> , xstd = WTD_SD, ystd = NECB_SD***) | 15.13 | 5.12–25.14   | -2.63     | -6.39– 1.13      | <i>deming</i> {deming} |
| Linear Mixed Effects Model | lmer(NECB ~ WTD <sub>a</sub> + (1 Location/Year))                  | 5.95  | 0.008–11.94  | 0.93      | -1.60–3.46       | <i>lmer</i> (lmerTest) |

\* To calculate CIs in R, we used the function `confint.lm` (package 'stats') for the simple linear regression. For robust linear regression, we also used the function `confint.lm` after obtaining the model's residual degrees of freedom using the `summary.rlm` function of the 'MASS' package. For Deming regression, CIs were given by printing the fitted model object. For the linear mixed effects model, we used the function `confint.merMod` (package 'lme4') to calculate CIs via parametric bootstrapping (100,000 bootstrap replicates).

\*\* Estimated with standard deviation (SD) estimates for WTD<sub>a</sub> per site-year, based on groundwater well replicates ( $n=3$ ). When well replicates were not present, average control site SD estimates were used. Estimates of the NECB SD were obtained as described in the main text.

\*\*\* WTD\_SD and NECB\_SD are the estimated standard deviations of the annual water table depth (WTD<sub>a</sub>) and net ecosystem carbon balance (NECB), respectively.

45 **Table S3. Overview of fitted empirical relations to estimate net ecosystem carbon balance (NECB; t C ha<sup>-1</sup> yr<sup>-1</sup>) based on mean annual water table depths (WTD<sub>a</sub>) that are plotted in Figure 9 of the main text. Please note that the fit of Koch et al. (2023) is identical to the fit of Tiemeyer et al. (2020) and thus not separately included here.**

| Study                           | Function with parameters                                                   |
|---------------------------------|----------------------------------------------------------------------------|
| <i>Current study</i>            | NECB = 8.96 WTD <sub>a</sub> - 0.23                                        |
| <i>Couwenberg et al. (2011)</i> | NECB = 20.54 WTD <sub>a</sub> - 1.29                                       |
| <i>Fritz et al. (2017)</i>      | NECB = 12.27 WTD <sub>a</sub> - 0.02                                       |
| <i>Tiemeyer et al. (2020)</i>   | NECB = -0.93 + 11.00 e <sup>-7.52</sup> e <sup>12.97 WTD<sub>a</sub></sup> |
| <i>Evans et al. (2021)</i>      | NECB = 9.27 WTD <sub>a</sub> - 1.69                                        |

## References

- Couwenberg, J., Thiele, A., Tanneberger, F., Augustin, J., Bärtsch, S., Dubovik, D., Liashchynskaya, N., Michaelis, D., Minke, M., Skuratovich, A., & Joosten, H. (2011). Assessing greenhouse gas emissions from peatlands using vegetation as a proxy. *Hydrobiologia*, 674(1), 67–89. <https://doi.org/10.1007/s10750-011-0729-x>
- Evans, C. D., Peacock, M., Baird, A. J., Artz, R. R. E., Burden, A., Callaghan, N., Chapman, P. J., Cooper, H. M., Coyle, M., Craig, E., Cumming, A., Dixon, S., Gauci, V., Grayson, R. P., Helfter, C., Heppell, C. M., Holden, J., Jones, D. L., Kaduk, J., ... Morrison, R. (2021). Overriding water table control on managed peatland greenhouse gas emissions. *Nature*, 593(7860), 548–552. <https://doi.org/10.1038/s41586-021-03523-1>
- Fritz, C., Geurts, J., Weideveld, S., Temmink, R., Bosma, N., Wichern, F., & Lamers, L. (2017). Meten is weten bij bodemdaling-mitigatie. Effect van peilbeheer en teeltkeuze op CO<sub>2</sub>-emissies en veenoxidatie. *Bodem*, 2, 20–22.
- Tiemeyer, B., Freibauer, A., Borraz, E. A., Augustin, J., Bechtold, M., Beetz, S., Beyer, C., Ebli, M., Eickenscheidt, T., Fiedler, S., Förster, C., Gensior, A., Giebels, M., Glatzel, S., Heinichen, J., Hoffmann, M., Höper, H., Jurasinski, G., Laggner, A., ... Drösler, M. (2020). A new methodology for organic soils in national greenhouse gas inventories: Data synthesis, derivation and application. *Ecological Indicators*, 109, 105838. <https://doi.org/10.1016/j.ecolind.2019.105838>
